# Supplementary material for: A facile and general approach for the preparation of boronic acid-functionalized magnetic nanoparticles for the selective enrichment of glycoproteins
Source: Royal Society of Chemistry journal article supplement (doi:10.1039/c8an01704b), 2018-11-20
Supplement: c8an01704b1.pdf [file c8an01704b1.pdf]

**Electronic Supplementary Information (ESI)**

**A Facile and General Approach for the Preparation of Boronic Acid-  
functionalized Magnetic Nanoparticles for the Selective Enrichment of  
Glycoproteins**

Xiaoting Xue, Rui Lu,\* Min Liu, Yi Li, Jiansheng Li and Lianjun Wang\*

Jiangsu Key Laboratory of Chemical Pollution Control and Resources Reuse, School  
of Environmental and Biological Engineering, Nanjing University of Science &  
Technology, Nanjing 210094, China

**\*Corresponding Authors:**

Dr. Rui Lu, Email: [rlu@njust.edu.cn](mailto:rlu@njust.edu.cn);

Prof. Lian-Jun Wang, Email: [wanglj@mail.njust.edu.cn](mailto:wanglj@mail.njust.edu.cn).

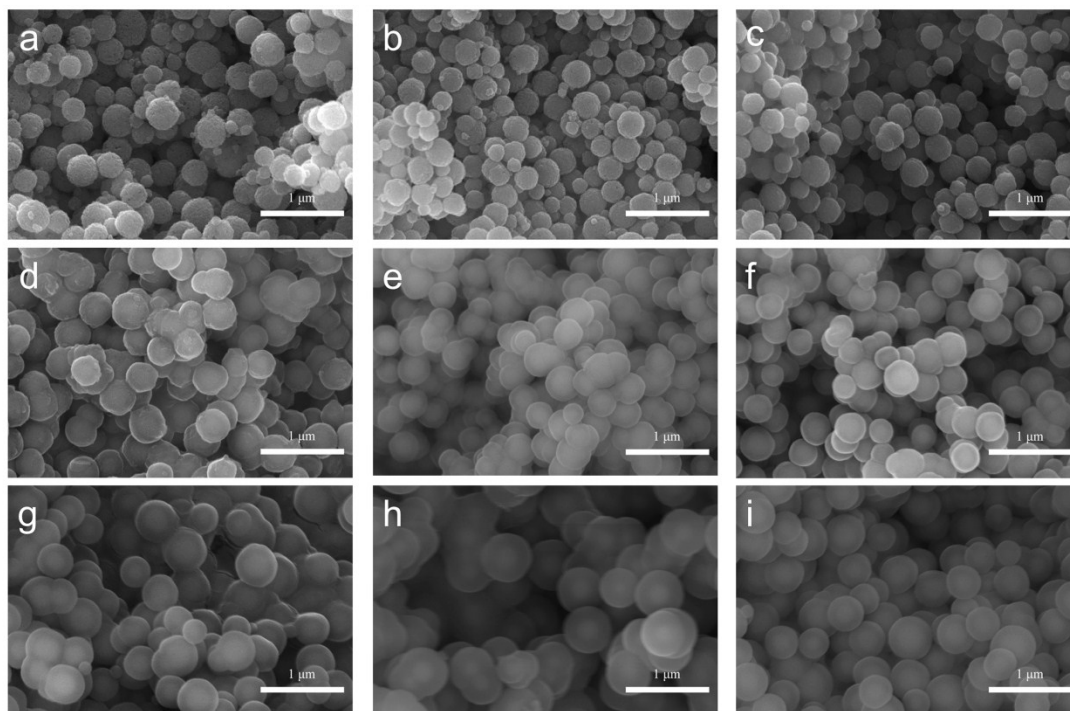

**Fig. S1** SEM images of  $\text{Fe}_3\text{O}_4$  (a, d and c),  $\text{Fe}_3\text{O}_4@\text{SiO}_2$  (d, e and f) and  $\text{Fe}_3\text{O}_4@\text{SiO}_2\text{-BA}$  (g, h and i) from three independent experiments.

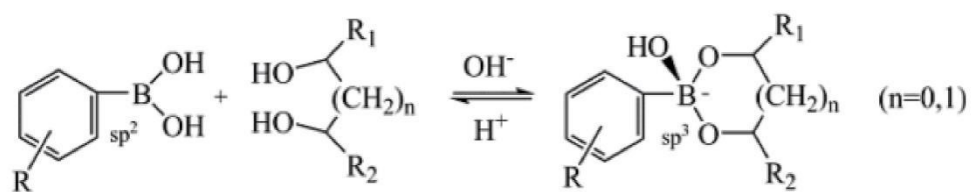

**Fig. S2** Mechanism of reaction between boric acid and the *cis*-diol moieties of glycans<sup>1</sup>.

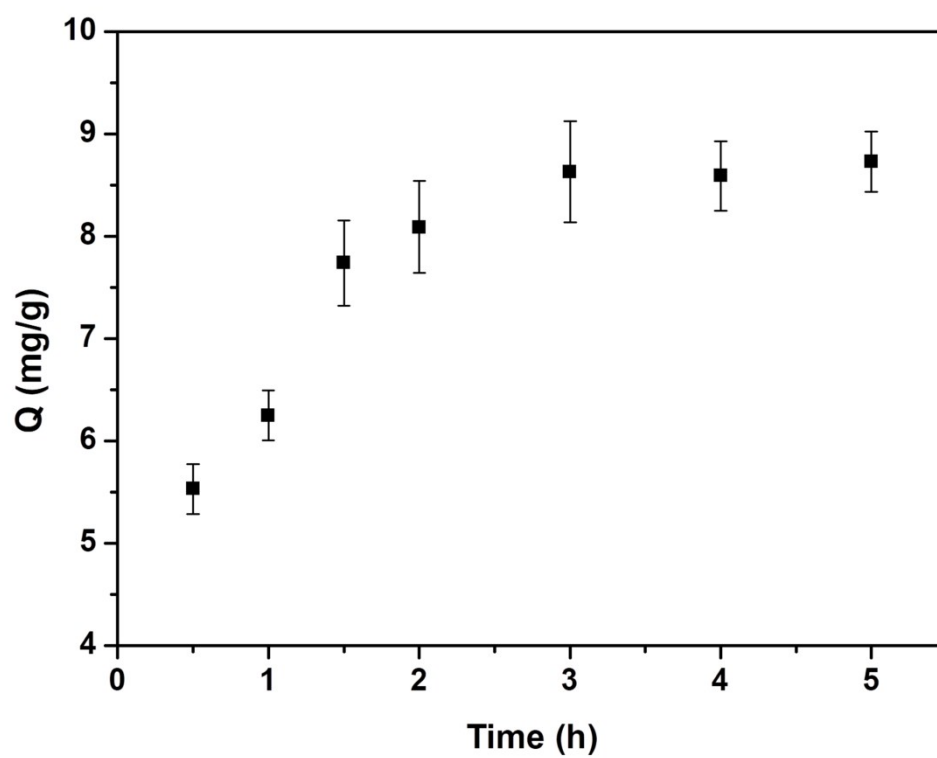

**Figure S3** Adsorption of ovalbumin (0.1 mg/mL) on  $\text{Fe}_3\text{O}_4@\text{SiO}_2\text{-BA}$  at pH 8.5 with different time.

**Reference:**

1. J. P. Lorand, Edwards J. O. Polyol, *J. Org. Chem.*, 1959, **6**, 769-774.
